# Supplementary material for: Retrospective analysis of the key molecules involved in the green synthesis of nanoparticles
Source: Royal Society of Chemistry journal article supplement (doi:10.1039/d2nr03632k), 2022-01-01
Supplement: d2nr03632k1.pdf [file d2nr03632k1.pdf]

## **Supporting Information**

### **Retrospective analysis of the key molecules involved in the green synthesis of nanoparticles**

Fazlurrahman Khan<sup>1, 2†\*</sup>, Geum-Jae Jeong<sup>3†</sup>, Priyanka Singh<sup>4†</sup>, Nazia Tabassum<sup>1,2</sup>, Ivan  
Mijakovic<sup>4, 5</sup> and Young-Mog Kim<sup>1, 2, 3\*</sup>

<sup>1</sup>*Marine Integrated Biomedical Technology Center, The National Key Research Institutes in Universities, Pukyong National University, Busan, 48513, Republic of Korea*

<sup>2</sup>*Research Center for Marine Integrated Bionics Technology, Pukyong National University, Busan 48513, Republic of Korea*

<sup>3</sup>*Department of Food Science and Technology, Pukyong National University, Busan 48513, Republic of Korea*

<sup>4</sup>*The Novo Nordisk Foundation, Center for Biosustainability, Technical University of Denmark, DK-2800 Kogens Lyngby, Denmark*

<sup>5</sup>*Systems and Synthetic Biology Division, Department of Biology and Biological Engineering, Chalmers University of Technology, SE-412 96 Gothenburg, Sweden*

**Running head:** Role of Pure natural compound in NPs formation

† Equally contributed

\*Corresponding author: Fazlurrahman Khan and Young-Mog Kim

Phone: +82-51-629-5832; Fax: +82-51-629-5824

E-mail: [fkhan055@pknu.ac.kr](mailto:fkhan055@pknu.ac.kr) and [ymkim@pknu.ac.kr](mailto:ymkim@pknu.ac.kr)

**Table S1** Mapping of physiochemical characteristics of extract and pure-compound based NPs

| Classification of compounds family | Extract-based NPs            |                  |                             |        |                      |             |                                            |                         |              | Pure compound-based NPs |            |                   |          |           |           |                                                  |                         |              |
|------------------------------------|------------------------------|------------------|-----------------------------|--------|----------------------|-------------|--------------------------------------------|-------------------------|--------------|-------------------------|------------|-------------------|----------|-----------|-----------|--------------------------------------------------|-------------------------|--------------|
|                                    | Extracts                     | NPs              | XRD                         | Charge | Size (nm)            | Shape       | FTIR (cm <sup>-1</sup> )                   | UV-visible spectra (nm) | Ref          | Pure Compound           | NPs        | XRD               | Charge   | Size (nm) | Shape     | FTIR (cm <sup>-1</sup> )                         | UV-visible spectra (nm) | Ref          |
| Flavonoids                         | Tulsi                        | Ag NPs           | 32°, 38°, 46° and 57°       | -      | 14.6                 | Spherical   | 1631, 2118, and 3345                       | 430                     | <sup>1</sup> | Quercetin               | Ag NPs     | 38°, 44°, and 64° | -        | 11.35     | Spherical | 1640, 2112, and 3370                             | 420                     | <sup>2</sup> |
|                                    | <i>Clerodendron serratum</i> | Ag NPs           | 38.2° and 44.1°             | -      | 5-30                 | Spherical   | -                                          | 400                     | <sup>3</sup> | Baicalein               | Au NPs     | -                 | -        | 26.5      | Spherical | 740, 898, 1082, 1158, 1292, 1386, 1388, and 1656 | 550                     | <sup>4</sup> |
|                                    | <i>Delonix elata</i>         | SnO <sub>2</sub> | 26.90°, 34.21°, 37.04°, 52. | -      | 5.92, 6.09, and 7.61 | Crystalline | 506, 608, 1381, 1618, 2848, 2920, and 3434 | 220-260                 | <sup>5</sup> | Rutin                   | Zinc oxide | -                 | Negative | 20-130    | Rod       | 951, 1114, 1632, 2891, and 3290                  | 355                     | <sup>6</sup> |

|            |                          |        |                                          |   |      |                             |                                       |     |              |                        |        |                                                                        |          |           |           |                                                                                                                  |     |               |
|------------|--------------------------|--------|------------------------------------------|---|------|-----------------------------|---------------------------------------|-----|--------------|------------------------|--------|------------------------------------------------------------------------|----------|-----------|-----------|------------------------------------------------------------------------------------------------------------------|-----|---------------|
|            |                          |        | 16°<br>,<br>58.36°<br>,<br>and<br>65.84° |   |      |                             |                                       |     |              |                        |        |                                                                        |          |           |           |                                                                                                                  |     |               |
| Terpenoids | <i>Ocimum sanctum</i>    | Au NPs | -                                        | - | 1-50 | Spherical and non-spherical | -                                     | 565 | <sup>7</sup> | $\beta$ -caryophyllene | Ag NPs | 28.79°<br>,<br>38.26°<br>,<br>44.45°<br>,<br>64.58°<br>, and<br>77.49° | Negative | 29.42     | Spherical | 615.01,<br>675.85,<br>856.90,<br>1073.78,<br>1273.01,<br>1332.61,<br>1406.50,<br>1621.46,<br>2928.96,<br>3407.98 | 420 | <sup>8</sup>  |
| Polyphenol | <i>Melissa azedarach</i> | Ag NPs | -                                        | - | 78   | Cubic and spherical         | 665, 1353, 1631, 2830, 3409, and 3433 | 436 | <sup>9</sup> | Tannic acid            | Ag NPs | 38.08°<br>,<br>44.14°<br>,<br>64.40°<br>,<br>77.24°<br>, and<br>81.24° | Negative | 27.7-46.7 | Spherical | 3200                                                                                                             | 423 | <sup>10</sup> |

|  |                          |                  |                                                                                           |   |                       |                                             |                                                             |         |               |             |        |   |   |             |           |   |     |               |
|--|--------------------------|------------------|-------------------------------------------------------------------------------------------|---|-----------------------|---------------------------------------------|-------------------------------------------------------------|---------|---------------|-------------|--------|---|---|-------------|-----------|---|-----|---------------|
|  | <i>Piperpedicellatum</i> | Ag NP and Au NPs | 38.18°, 44.44°, 36°, 64.96°, , and 55.54°/38.16°, 44.74°, , 64.72°, , 77.64°, , and 81.7° | - | 10.5 ± 0.8/14.3 ± 0.5 | Spherical, hexagonal, and pentagonal shaped | 1078, 1388, 1606, and 3248/1066, 1408, 1612, 2920, and 3267 | 550/446 | <sup>11</sup> | Gallic acid | Au NPs | - | - | 8.99 ± 0.92 | Spherical | - | 520 | <sup>12</sup> |
|--|--------------------------|------------------|-------------------------------------------------------------------------------------------|---|-----------------------|---------------------------------------------|-------------------------------------------------------------|---------|---------------|-------------|--------|---|---|-------------|-----------|---|-----|---------------|

|  |                               |        |                                            |          |        |           |                                       |     |               |                  |                    |                                              |          |                                                        |                               |                                        |              |               |
|--|-------------------------------|--------|--------------------------------------------|----------|--------|-----------|---------------------------------------|-----|---------------|------------------|--------------------|----------------------------------------------|----------|--------------------------------------------------------|-------------------------------|----------------------------------------|--------------|---------------|
|  | <i>Aesculus hippocastanum</i> | Ag NPs | 38.03°, 44.29°, 64.49°, 77.49°, and 81.51° | Negative | 50 ± 5 | Spherical | 589, 1073, 1636, 2115, and 3246       | 464 | <sup>13</sup> | Resveratrol      | Au NPs and Ag NPs  | 38.18°, 44.42°, 64.62°, 77.52°, and 81.52°   | Negative | 8.32-21.84                                             | Face-centered cubic structure | 1593, 1613, 3393, 3406, 3538, and 3733 | 547, 412-417 | <sup>14</sup> |
|  | Green coffee bean             | Ag NPs | -                                          | -        | 10-30  | Spherical | -                                     | 405 | <sup>15</sup> | Chlorogenic acid | Au NPs             | -                                            | Negative | 18.94 ± 1.81, 30.42 ± 6.32, 37.86 ± 3.80, 48.72 ± 6.47 | Spherical                     | -                                      | 200-350      | <sup>16</sup> |
|  | <i>Ecklonia cava</i>          | Ag NPs | 28.0°, 32.5°, 38.2°, 44.                   | -        | 43     | Spherical | 823, 1030, 1243, 1370, 1609, and 3347 | 418 | <sup>17</sup> | Phloroglucinol   | Au NPs and Zn ONPs | 38.3°, 45.3°, 56.4°, 66.1°, 75.2°, and 83.8° | Negative | 41.6 ± 3.9, 52.7 ± 3.8                                 | Spherical, hexagonal          | -                                      | 480          | <sup>18</sup> |

|          |                          |               |                                                                            |   |                 |               |                                                                                                                     |             |               |              |                                                                                          |   |   |                                 |                                                                       |                                                                                                         |                             |               |
|----------|--------------------------|---------------|----------------------------------------------------------------------------|---|-----------------|---------------|---------------------------------------------------------------------------------------------------------------------|-------------|---------------|--------------|------------------------------------------------------------------------------------------|---|---|---------------------------------|-----------------------------------------------------------------------|---------------------------------------------------------------------------------------------------------|-----------------------------|---------------|
|          |                          |               | 3°,<br>46.<br>4°,<br>55.<br>1°,<br>64.<br>6°,<br>and<br>77.<br>2°          |   |                 |               |                                                                                                                     |             |               |              | 31.6°,<br>34°,<br>36°,<br>47.3°,<br>56.4°,<br>62.6°,<br>67.6°,<br>68.8°,<br>and<br>76.6° |   |   |                                 |                                                                       |                                                                                                         |                             |               |
| Alkaloid | <i>Coffea arabica</i>    | Au<br>NP<br>s | 38.<br>31°<br>,<br>44.<br>45°<br>,<br>64.<br>64°<br>,<br>and<br>77.<br>73° | - | 14.90<br>± 3.02 | Spher<br>ical | 1550 and<br>1750                                                                                                    | 600-<br>800 | <sup>19</sup> | Caffe<br>ine | Au<br>NP<br>s                                                                            | - | - | 77.9<br>± 5.0                   | -                                                                     | -                                                                                                       | 523                         | <sup>20</sup> |
|          | <i>Chenopodium album</i> | Ag<br>NP<br>s | -                                                                          | - | 39-43           | Spher<br>ical | 760.90,<br>1396.44,<br>1463.23,<br>1477.99,<br>1694.28,<br>1741.85,<br>2855.26,<br>3621.10,<br>3649.64,<br>3678.67, | 421         | <sup>21</sup> | Sapon<br>in  | Au<br>NP<br>s<br>and<br>Ag<br>NP<br>s                                                    | - | - | 37.7-<br>79.9,<br>17.9-<br>59.6 | Spheri<br>cal,<br>cubica<br>l, and<br>hexag<br>onal/S<br>pheric<br>al | 1637.76,<br>2361.19,<br>2923.92,<br>3448.53/<br>1120.01,<br>1637.06,<br>2363.70,<br>2924.26,<br>3422.42 | 440-<br>580/2<br>60-<br>380 | <sup>22</sup> |

|                |                               |                   |   |          |                   |           |                                                                     |     |               |          |        |                                       |          |      |           |                                                        |     |               |
|----------------|-------------------------------|-------------------|---|----------|-------------------|-----------|---------------------------------------------------------------------|-----|---------------|----------|--------|---------------------------------------|----------|------|-----------|--------------------------------------------------------|-----|---------------|
|                |                               |                   |   |          |                   |           | and<br>3744.37                                                      |     |               |          |        |                                       |          |      |           |                                                        |     |               |
| Macromolecules | <i>Saccorhiza polyschides</i> | Au NPs and Ag NPs | - | Negative | 14 ± 2 and 15 ± 3 | Spherical | 842, 1100-1022, 1259, 1200-800, 1460-1380, 2940-2928, and 3460-3408 | 534 | <sup>23</sup> | Fucoidan | Au NPs | 38.13° , 44.43° , 64.66° , and 77.66° | Negative | ~53  | Spherical | 845, 1159-1260, 1633, 1637, 2932, 2933, 3441, and 3444 | 570 | <sup>24</sup> |
|                | Silk worm cocoon              | Ag NPs            | - | -        | 48-117            | Round     | 830, 1200-1300, 1353, 1404, 1451, 1500-1560, and 1600-1700          | 420 | <sup>25</sup> | Sericin  | Ag NPs | 19.8° , 38.2° , and 64.4°             | -        | 4-20 | -         | 1402, 1532, and 1657                                   | 405 | <sup>26</sup> |

|        |                           |               |                                            |   |       |           |   |     |               |            |               |                                                       |          |    |           |                               |     |               |
|--------|---------------------------|---------------|--------------------------------------------|---|-------|-----------|---|-----|---------------|------------|---------------|-------------------------------------------------------|----------|----|-----------|-------------------------------|-----|---------------|
| Others | <i>Curvularia pallens</i> | Ag<br>NP<br>s | 37.9°,<br>44.1°,<br>64.1°,<br>and<br>77.0° | - | 16.74 | Spherical | - | 415 | <sup>27</sup> | Curvularin | Ag<br>NP<br>s | 38.68°<br>,<br>46.1°<br>,<br>64.11°<br>, and<br>77.4° | Negative | 37 | Spherical | 1639,<br>2928,<br>and<br>3304 | 430 | <sup>28</sup> |
|--------|---------------------------|---------------|--------------------------------------------|---|-------|-----------|---|-----|---------------|------------|---------------|-------------------------------------------------------|----------|----|-----------|-------------------------------|-----|---------------|



## References

1. S. Jain and M. S. Mehata, *Scientific Reports*, 2017, **7**, 15867.
2. S. Jain and M. S. Mehata, *Scientific reports*, 2017, **7**, 1-13.
3. R. Priyadharshini Raman, S. Parthiban, B. Srinithya, V. Vinod Kumar, S. Philip Anthony, A. Sivasubramanian and M. Sundaram Muthuraman, *Materials Letters*, 2015, **160**, 400-403.
4. J. Rajkumari, S. Busi, A. C. Vasu and P. Reddy, *Microbial pathogenesis*, 2017, **107**, 261-269.
5. K. C. Suresh, S. Surendhiran, P. Manoj Kumar, E. Ranjith Kumar, Y. A. S. Khadar and A. Balamurugan, *SN Applied Sciences*, 2020, **2**, 1735.
6. D. Bharathi and V. Bhuvaneshwari, *Research on Chemical Intermediates*, 2019, **45**, 2065-2078.
7. S. Y. Lee, S. Krishnamurthy, C.-W. Cho and Y.-S. Yun, *ACS Sustainable Chemistry & Engineering*, 2016, **4**, 2651-2659.
8. C. Kamaraj, G. Balasubramani, C. Siva, M. Raja, V. Balasubramanian, R. K. Raja, S. Tamilselvan, G. Benelli and P. Perumal, *Journal of Cluster Science*, 2017, **28**, 1667-1684.
9. R. Sukirtha, K. M. Priyanka, J. J. Antony, S. Kamalakkannan, R. Thangam, P. Gunasekaran, M. Krishnan and S. Achiraman, *Process Biochemistry*, 2012, **47**, 273-279.
10. T. Y. Kim, S. H. Cha, S. Cho and Y. Park, *Arch Pharm Res*, 2016, **39**, 465-473.
11. C. Tamuly, M. Hazarika, S. C. Borah, M. R. Das and M. P. Boruah, *Colloids and Surfaces B: Biointerfaces*, 2013, **102**, 627-634.
12. N. Rattanata, S. Klaynongsruang, C. Leelayuwat, T. Limpai boon, A. Lulitanond, P. Boonsiri, S. Chio-Srichan, S. Soontaranon, S. Rugmai and J. Daduang, *International journal of nanomedicine*, 2016, **11**, 3347-3356.
13. F. Ö. Küp, S. Coşkunçay and F. Duman, *Materials Science and Engineering: C*, 2020, **107**, 110207.
14. S. Park, S.-H. Cha, I. Cho, S. Park, Y. Park, S. Cho and Y. Park, *Materials Science and Engineering: C*, 2016, **58**, 1160-1169.
15. M. Wang, W. Zhang, X. Zheng and P. Zhu, *RSC advances*, 2017, **7**, 12144-12149.
16. S. Zhu, Y. Shen, Y. Yu and X. Bai, *Royal Society Open Science*, 2020, **7**, 191141.
17. J. Venkatesan, S.-K. Kim and M. S. Shim, *Nanomaterials*, 2016, **6**, 235.
18. F. Khan, M.-G. Kang, D.-M. Jo, P. Chandika, W.-K. Jung, H. W. Kang and Y.-M. Kim, *Marine Drugs*, 2021, **19**, 601.
19. W. J. Keijok, R. H. A. Pereira, L. A. C. Alvarez, A. R. Prado, A. R. da Silva, J. Ribeiro, J. P. de Oliveira and M. C. C. Guimarães, *Scientific Reports*, 2019, **9**, 16019.
20. F. Khan, S.-K. Park, N. I. Bamunuarachchi, D. Oh and Y.-M. Kim, *Applied Microbiology and Biotechnology*, 2021, **105**, 3717-3731.
21. N. Srivastava, M. Choudhary, G. Singhal and S. S. Bhagyawant, *Proceedings of the National Academy of Sciences, India Section B: Biological Sciences*, 2020, **90**, 333-341.
22. G. R and S. D.V.L, *Industrial Crops and Products*, 2013, **51**, 107-115.
23. N. González-Ballesteros, L. Diego-González, M. Lastra-Valdor, M. Grimaldi, A. Cavazza, F. Bigi, M. C. Rodríguez-Argüelles and R. Simón-Vázquez, *Materials Science and Engineering: C*, 2021, **123**, 111960.
24. F. Khan, P. Manivasagan, J.-W. Lee, D. T. N. Pham, J. Oh and Y.-M. Kim, *Marine Drugs*, 2019, **17**, 208.
25. P. Aramwit, N. Bang, J. Ratanavaraporn and S. Ekgasit, *Nanoscale Research Letters*, 2014, **9**, 79.
26. H. He, G. Tao, Y. Wang, R. Cai, P. Guo, L. Chen, H. Zuo, P. Zhao and Q. Xia, *Materials Science and Engineering: C*, 2017, **80**, 509-516.
27. A. M. Elgorban, A. E.-R. M. El-Samawaty, O. H. Abd-Elkader, M. A. Yassin, S. R. M. Sayed, M. Khan and S. Farooq Adil, *Saudi Journal of Biological Sciences*, 2017, **24**, 1522-1528.

28. S. I. Abdel-Hafez, N. A. Nafady, I. R. Abdel-Rahim, A. M. Shaltout, J.-A. Daròs and M. A. Mohamed, *Journal of Pharmaceutical and Applied Chemistry*, 2017, **3**, 135-146.
